# Supplementary figures and images for: Elimination of Reprogramming Transgenes Facilitates the Differentiation of Induced Pluripotent Stem Cells into Hepatocyte-like Cells and Hepatic Organoids
Source: MDPI journal article supplement (doi:10.3390/biology11040493), 2022-03-23

Figure S1

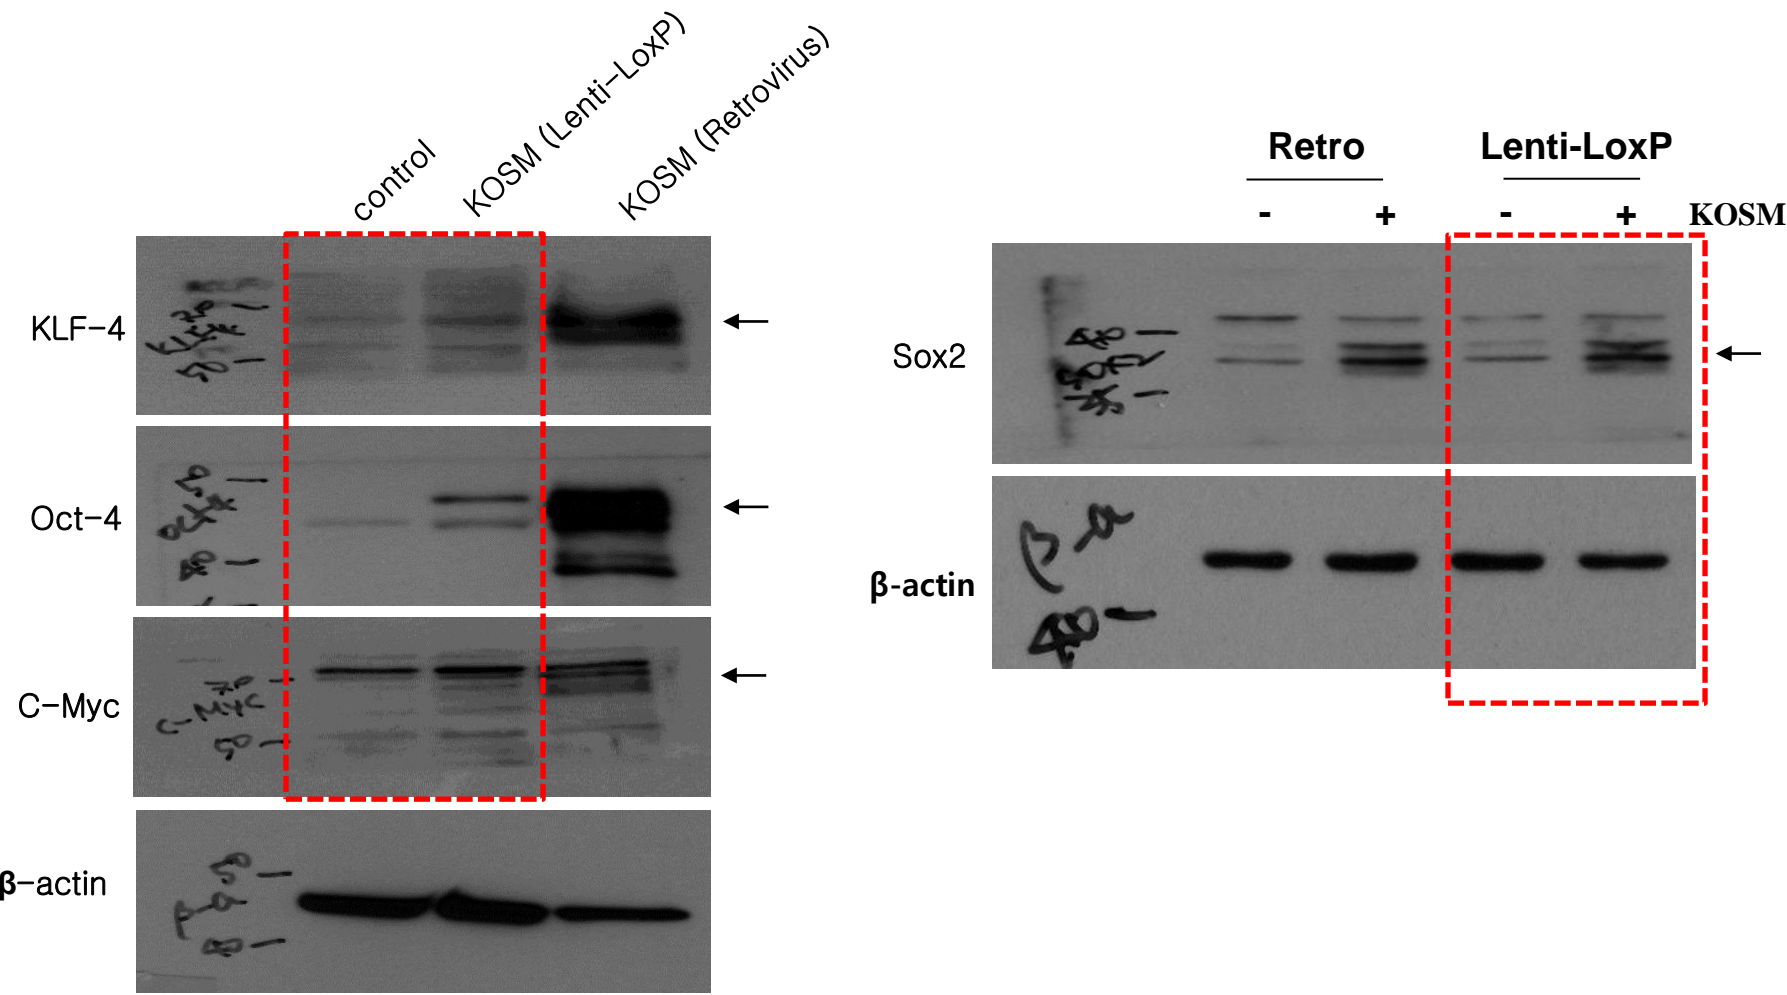

**Figure S2**

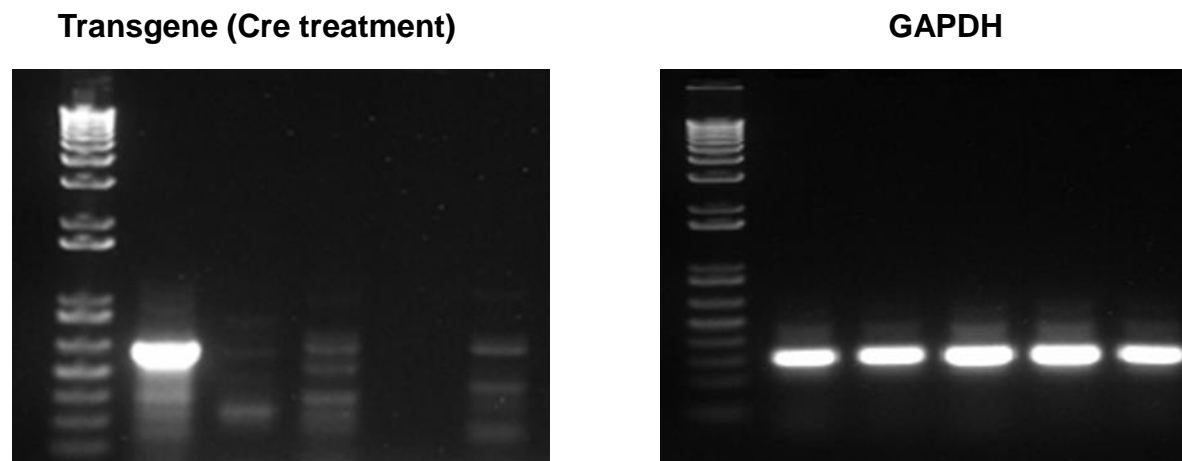

Supplement: s1 [file s1]
